# Supplementary material for: Widely Targeted Metabolomics Analysis Reveals the Differences of Nonvolatile Compounds in Oolong Tea in Different Production Areas
Source: MDPI journal article supplement (doi:10.3390/foods11071057), 2022-04-06
Supplement: s1 [file s1]

**Table S1.** Information of Oolong tea samples in different producing areas

| Sample number<br>(Metabolome sample) | Sample source       | Commodity information                     |
|--------------------------------------|---------------------|-------------------------------------------|
| GD1                                  | Guangdong, China    | Super Shuixian                            |
| GD2                                  |                     | First class Shuixian                      |
| GD3 (GDa, GDb, GDe)                  |                     | Super Dancong (Fenghuangdancong)          |
| GD4                                  |                     | First class Dancong (Fenghuangdancong)    |
| GD5                                  |                     | Second class Dancong (Fenghuangdancong)   |
| GD6                                  |                     | Heimeiren                                 |
| GD7                                  |                     | Guihuaxiang                               |
| GD8                                  |                     | Dashu Tea                                 |
| MN1                                  | South Fujian, China | Dangui                                    |
| MN2                                  |                     | Dayewulong                                |
| MN3                                  |                     | Jinguan Yin                               |
| MN4 (MNa, MNb, MNc)                  |                     | Tieguanyin                                |
| MN5                                  |                     | Huangdan                                  |
| MN6                                  |                     | Maoxie                                    |
| MN7                                  |                     | Benshan                                   |
| MB1                                  | North Fujian, China | Jinmudan                                  |
| MB2 (MBa, MBb, MBc)                  |                     | Dahongpao (Wuyi Rock Tea)                 |
| MB3                                  |                     | Super Rougui                              |
| MB4                                  |                     | First class Rougui                        |
| MB5                                  |                     | Second class Rougui                       |
| MB6                                  |                     | Super Shuixian                            |
| MB7                                  |                     | First class Shuixian                      |
| MB8                                  |                     | Second class Shuixian                     |
| JP1 (J1a, J1b, J1c)                  | Japan               | Japanese market (Chunxun)                 |
| JP2 (J2a, J2b, J2c)                  |                     | Japanese market (Flower)                  |
| JP3 (J3a, J3b, J3c)                  |                     | Japanese market (Fangkou)                 |
| JP4                                  |                     | Japanese market (Shuang)                  |
| JP5                                  |                     | Japanese market (Granular oolong tea)     |
| MM1 (M1a, M1b, M1c)                  | Myanmar             | Myanmar market (High mountain Oolong tea) |
| MM2 (M2a, M2b, M2c)                  |                     | Myanmar market                            |
| MM3 (M3a, M3b, M3c)                  |                     | Myanmar market                            |
| MM4                                  |                     | Myanmar market (High mountain Oolong tea) |
| MM5                                  |                     | Myanmar market                            |
| LK1 (S1a, S1b, S1c)                  | Sri Lanka           | Sri Lanka (I. S.B. experts)               |
| LK2 (S2a, S2b, S2c)                  |                     | Sri Lanka (Ceylon oolong tea)             |
| LK3 (S3a, S3b, S3c)                  |                     | Sri Lanka market                          |

Note: GD, Guangdong, China; MB, Northern Fujian, China; MN, Southern Fujian, China; MM, Myanmar; LK, Sri Lanka; JP, Japan. GD3 (GDa, GDb, GDc) represents metabolome samples, and a, b, and c represent three biological repetitions. Others represent the same.

**Table S4.** KEGG metabolic pathway enrichment information

| Name                                        | Hits | Impact  | p         |
|---------------------------------------------|------|---------|-----------|
| Purine metabolism                           | 13   | 0.28602 | 0.10886   |
| Flavonoid biosynthesis                      | 12   | 0.37781 | 0.029514  |
| Aminoacyl-tRNA biosynthesis                 | 7    | 0.05556 | 0.50411   |
| Galactose metabolism                        | 6    | 0.34489 | 0.18319   |
| Cysteine and methionine metabolism          | 6    | 0.32858 | 0.67231   |
| Amino sugar and nucleotide sugar metabolism | 6    | 0.25028 | 0.75105   |
| Arginine and proline metabolism             | 6    | 0.18157 | 0.36537   |
| Starch and sucrose metabolism               | 5    | 0.59154 | 0.20132   |
| Alanine, aspartate and glutamate metabolism | 5    | 0.32734 | 0.20132   |
| Tyrosine metabolism                         | 5    | 0.28379 | 0.06786   |
| Ascorbate and aldarate metabolism           | 5    | 0.23881 | 0.10482   |
| Tryptophan metabolism                       | 5    | 0.22222 | 0.3791    |
| Phenylpropanoid biosynthesis                | 5    | 0.10174 | 0.81706   |
| Isoquinoline alkaloid biosynthesis          | 4    | 1       | 0.0049915 |
| Pentose and glucuronate interconversions    | 4    | 0.09375 | 0.18958   |
| Citrate cycle (TCA cycle)                   | 4    | 0.23269 | 0.32429   |
| Valine, leucine and isoleucine biosynthesis | 4    | 0.05721 | 0.39461   |
| Inositol phosphate metabolism               | 4    | 0.10251 | 0.59197   |
| Glyoxylate and dicarboxylate metabolism     | 4    | 0.03371 | 0.62111   |
| Glycine, serine and threonine metabolism    | 4    | 0.10708 | 0.72401   |
| Valine, leucine and isoleucine degradation  | 4    | 0.00991 | 0.80475   |
| Flavone and flavonol biosynthesis           | 3    | 0       | 0.16463   |
| Anthocyanin biosynthesis                    | 3    | 0.33333 | 0.20354   |
| Nicotinate and nicotinamide metabolism      | 3    | 0.0606  | 0.28614   |
| Arginine biosynthesis                       | 3    | 0.10097 | 0.49336   |
| Lysine degradation                          | 3    | 0.5     | 0.49336   |
| Pentose phosphate pathway                   | 3    | 0.37301 | 0.5316    |
| Propanoate metabolism                       | 3    | 0.10591 | 0.56819   |
| Zeatin biosynthesis                         | 3    | 0.0271  | 0.60297   |
| Carbon fixation in photosynthetic organisms | 3    | 0.17556 | 0.60297   |
| Glutathione metabolism                      | 3    | 0.35113 | 0.74808   |
| Glycerophospholipid metabolism              | 3    | 0.09397 | 0.92062   |
| Glucosinolate biosynthesis                  | 3    | 0       | 0.99757   |
| Betalain biosynthesis                       | 2    | 1       | 0.056282  |
| Vitamin B6 metabolism                       | 2    | 0.03205 | 0.48639   |
| Sulfur metabolism                           | 2    | 0.0663  | 0.66056   |
| Butanoate metabolism                        | 2    | 0.13636 | 0.72828   |

|                                                           |   |         |         |
|-----------------------------------------------------------|---|---------|---------|
| beta-Alanine metabolism                                   | 2 | 0.14683 | 0.75764 |
| Fructose and mannose metabolism                           | 2 | 0.1351  | 0.80824 |
| Glycerolipid metabolism                                   | 2 | 0.05957 | 0.82985 |
| Pyruvate metabolism                                       | 2 | 0       | 0.84925 |
| Thiamine metabolism                                       | 2 | 0       | 0.84925 |
| Phenylalanine, tyrosine and tryptophan biosynthesis       | 2 | 0.11011 | 0.84925 |
| Pantothenate and CoA biosynthesis                         | 2 | 0       | 0.86662 |
| Glycolysis / Gluconeogenesis                              | 2 | 0.10295 | 0.90832 |
| Ubiquinone and other terpenoid-quinone biosynthesis       | 2 | 0.00097 | 0.98122 |
| Pyrimidine metabolism                                     | 2 | 0.02076 | 0.98122 |
| Linoleic acid metabolism                                  | 1 | 0       | 0.46422 |
| Indole alkaloid biosynthesis                              | 1 | 0.5     | 0.46422 |
| Biosynthesis of secondary metabolites - unclassified      | 1 | 1       | 0.54174 |
| Biosynthesis of secondary metabolites - other antibiotics | 1 | 0       | 0.6081  |
| One carbon pool by folate                                 | 1 | 0       | 0.71347 |
| Stilbenoid, diarylheptanoid and gingerol biosynthesis     | 1 | 0.13235 | 0.71347 |
| Lysine biosynthesis                                       | 1 | 0       | 0.75504 |
| Caffeine metabolism                                       | 1 | 0       | 0.7906  |
| Riboflavin metabolism                                     | 1 | 0.11852 | 0.82102 |
| Phenylalanine metabolism                                  | 1 | 0.23529 | 0.82102 |
| Nitrogen metabolism                                       | 1 | 0       | 0.84704 |
| Histidine metabolism                                      | 1 | 0       | 0.90459 |
| Sphingolipid metabolism                                   | 1 | 0.03365 | 0.93039 |
| Biotin metabolism                                         | 1 | 0.07692 | 0.94055 |
| Biosynthesis of unsaturated fatty acids                   | 1 | 0       | 0.96841 |
| Phosphatidylinositol signaling system                     | 1 | 0.03285 | 0.98325 |
| alpha-Linolenic acid metabolism                           | 1 | 0.10665 | 0.98781 |
| Cyanoamino acid metabolism                                | 1 | 0       | 0.9896  |
| Terpenoid backbone biosynthesis                           | 1 | 0       | 0.99113 |
| Fatty acid biosynthesis                                   | 1 | 0       | 0.99986 |

**Table S5.** Correlation between differential nonvolatile compounds and taste attributes

| Number | Non-volatile compounds         | Umami  | Bitterness | Sweet<br>aftertaste | Astringency | Heavy<br>and thick |
|--------|--------------------------------|--------|------------|---------------------|-------------|--------------------|
| V1     | N6-Acetyl-L-lysine             | -0.094 | 0.469      | 0.729               | 0.433       | 0.701              |
| V2     | L-Theanine                     | -0.028 | 0.045      | 0.532               | 0.208       | 0.712              |
| V3     | L-Tyramine                     | -0.628 | 0.730      | 0.250               | 0.415       | 0.483              |
| V4     | L-(-)-Tyrosine                 | 0.715  | -0.234     | 0.233               | 0.015       | 0.104              |
| V5     | 5-Hydroxy-L-tryptophan         | 0.737  | -0.344     | 0.190               | 0.062       | -0.013             |
| V6     | S-(5'-Adenosyl)-L-homocysteine | 0.793  | -0.320     | -0.092              | -0.245      | -0.463             |
| V7     | L-Glutamine                    | 0.827  | -0.254     | -0.376              | -0.278      | -0.567             |
| V8     | N,N-Dimethylglycine            | 0.805  | -0.164     | 0.017               | -0.096      | -0.224             |

|     |                                          |        |        |        |        |        |
|-----|------------------------------------------|--------|--------|--------|--------|--------|
| V9  | Allysine(6-Oxo<br>DL-Norleucine)         | 0.786  | -0.503 | 0.109  | -0.019 | -0.269 |
| V10 | $\gamma$ -aminobutyric acid              | 0.822  | -0.288 | -0.211 | -0.314 | -0.388 |
| V11 | Ferulic acid                             | -0.424 | 0.533  | 0.611  | 0.383  | 0.713  |
| V12 | 4-Methylumbelliferone                    | -0.584 | 0.204  | 0.666  | 0.303  | 0.758  |
| V13 | Syringic acid                            | 0.487  | -0.243 | -0.435 | -0.273 | -0.773 |
| V14 | 3-(4-Hydroxyphenyl)propionic acid        | 0.809  | -0.451 | 0.201  | 0.148  | -0.578 |
| V15 | 3-Hydroxy-4-methoxycinnamic acid         | -0.430 | 0.540  | 0.603  | 0.382  | 0.700  |
| V16 | Trans-cinnamaldehyde                     | 0.867  | -0.403 | 0.005  | -0.159 | -0.445 |
| V17 | Syringin                                 | 0.803  | -0.322 | 0.323  | 0.166  | -0.057 |
| V18 | 6,7-Dihydroxycoumarin-6-glucoside        | -0.702 | 0.192  | -0.024 | -0.063 | 0.546  |
| V19 | Xanthotoxol                              | 0.805  | -0.327 | -0.311 | -0.419 | -0.456 |
| V20 | Brevifolincarboxylic acid                | -0.222 | 0.114  | -0.885 | -0.411 | -0.431 |
| V21 | Isofraxidin                              | 0.131  | 0.055  | -0.488 | -0.175 | -0.730 |
| V22 | 2'-Deoxyinosine-5'-monophosphate         | -0.565 | 0.243  | 0.440  | 0.197  | 0.733  |
| V23 | Purine                                   | -0.662 | 0.733  | 0.223  | 0.396  | 0.492  |
| V24 | 5'-Deoxy-5'-(methylthio)adenosine        | 0.710  | -0.428 | -0.246 | -0.304 | -0.698 |
| V25 | 7-Methylxanthine                         | -0.001 | 0.767  | 0.081  | 0.210  | 0.511  |
| V26 | $\beta$ -Pseudouridine                   | -0.134 | -0.189 | 0.743  | 0.418  | 0.578  |
| V27 | UDP- $\alpha$ -D-glucose                 | 0.627  | -0.637 | -0.457 | -0.435 | -0.771 |
| V28 | Riboprine                                | 0.424  | -0.187 | -0.599 | -0.306 | -0.770 |
| V29 | Inosine 5'-monophosphate                 | -0.515 | 0.505  | 0.533  | 0.704  | 0.519  |
| V30 | Peonidin O-hexoside                      | 0.531  | -0.704 | -0.359 | -0.558 | -0.455 |
| V31 | Cyanidin                                 | -0.047 | 0.701  | 0.255  | 0.216  | 0.474  |
| V32 | Peonidin 3-O-glucoside chloride          | 0.581  | -0.720 | -0.292 | -0.471 | -0.414 |
| V33 | Tricin                                   | -0.538 | 0.796  | 0.283  | 0.394  | 0.586  |
| V34 | Luteolin 7-O-glucoside                   | -0.755 | 0.394  | -0.014 | 0.160  | 0.369  |
| V35 | Chrysoeriol O-glucuronic acid            | -0.719 | 0.245  | -0.417 | -0.109 | 0.125  |
| V36 | Quercetin 3-O-rutinoside                 | -0.723 | 0.131  | -0.068 | 0.078  | 0.239  |
| V37 | Kaempferol 3-O-rutinoside                | -0.713 | 0.616  | 0.139  | 0.378  | 0.388  |
| V38 | Kaempferol 7-O-rhamnoside                | -0.323 | 0.713  | 0.437  | 0.525  | 0.440  |
| V39 | 3,7-Di-O-methylquercetin                 | -0.375 | 0.821  | 0.170  | 0.084  | 0.649  |
| V40 | Kaempferol-3-O-rutinoside-7-O-rhamnoside | -0.128 | 0.293  | 0.744  | 0.719  | 0.529  |
| V41 | Kaempferol 3-O-glucoside                 | 0.812  | -0.539 | -0.139 | -0.281 | -0.545 |
| V42 | Hesperetin<br>7-O-neohesperidoside       | -0.722 | 0.127  | -0.038 | 0.089  | 0.268  |
| V43 | Naringenin 7-O-glucoside                 | 0.591  | -0.703 | -0.230 | -0.381 | -0.717 |

|     |                                                  |        |        |        |        |        |
|-----|--------------------------------------------------|--------|--------|--------|--------|--------|
| V44 | Hesperetin 7-rutinoside                          | -0.710 | 0.135  | -0.044 | 0.098  | 0.254  |
| V45 | Isoliquiritigenin                                | -0.799 | 0.470  | -0.377 | -0.049 | 0.272  |
| V46 | Catechin                                         | -0.354 | 0.216  | -0.867 | -0.365 | -0.406 |
| V47 | Epigallocatechin                                 | -0.774 | 0.254  | -0.480 | -0.119 | 0.009  |
| V48 | (+)-Gallocatechin                                | -0.784 | 0.249  | -0.497 | -0.135 | -0.003 |
| V49 | 3-Indoleacetonitrile                             | 0.739  | -0.526 | -0.091 | -0.120 | -0.735 |
| V50 | Oryzaalexin E                                    | 0.726  | -0.568 | -0.014 | -0.319 | -0.259 |
| V51 | 4-Methyl-5-thiazoleethanol                       | -0.707 | 0.786  | 0.154  | 0.432  | 0.415  |
| V52 | Hydroxyphenethylamine                            | -0.667 | 0.762  | 0.217  | 0.416  | 0.486  |
| V53 | Glucarate O-Phosphoric acid                      | 0.542  | -0.345 | 0.743  | 0.311  | 0.275  |
| V54 | Mangiferin                                       | 0.486  | -0.524 | -0.299 | -0.300 | -0.788 |
| V55 | N-Methyltryptamine                               | 0.298  | -0.173 | -0.657 | -0.379 | -0.702 |
| V56 | Dendrobine                                       | -0.621 | 0.711  | 0.268  | 0.383  | 0.521  |
| V57 | D(+)-Melezitose                                  | 0.016  | -0.786 | -0.179 | -0.442 | -0.469 |
| V58 | D(-)-Threose                                     | -0.732 | 0.782  | 0.111  | 0.438  | 0.396  |
| V59 | D(+)-Glucose                                     | 0.800  | -0.459 | 0.214  | 0.105  | -0.148 |
| V60 | D-Fructose 6-phosphate                           | 0.327  | -0.338 | 0.739  | 0.332  | 0.228  |
| V61 | D-(+)-Mannose                                    | 0.779  | -0.528 | 0.315  | 0.099  | -0.080 |
| V62 | Panose                                           | 0.033  | -0.791 | -0.055 | -0.379 | -0.373 |
| V63 | Syringaldehyde O-glucoside                       | 0.475  | -0.496 | -0.199 | -0.300 | -0.717 |
| V64 | p-Coumaroyl quinic acid<br>O-glucuronic acid     | -0.691 | 0.812  | 0.118  | 0.476  | 0.422  |
| V65 | Methyl gallate                                   | -0.042 | 0.571  | 0.703  | 0.663  | 0.554  |
| V66 | Chlorogenic acid                                 | -0.749 | 0.561  | -0.363 | 0.052  | 0.240  |
| V67 | 4-Hydroxybenzoic acid                            | -0.080 | -0.070 | -0.764 | -0.550 | -0.373 |
| V68 | Gallic acid                                      | -0.655 | 0.716  | 0.231  | 0.340  | 0.560  |
| V69 | Chlorogenic acid methyl ester                    | 0.024  | 0.101  | -0.873 | -0.361 | -0.664 |
| V70 | Succinic acid                                    | 0.729  | -0.576 | 0.516  | 0.059  | -0.019 |
| V71 | Quinic acid                                      | -0.021 | -0.188 | -0.797 | -0.468 | -0.733 |
| V72 | Citric acid                                      | -0.011 | -0.273 | -0.616 | -0.317 | -0.771 |
| V73 | Fumaric acid                                     | 0.585  | -0.821 | -0.003 | -0.203 | -0.651 |
| V74 | $\alpha$ -Hydroxyisobutyric acid                 | 0.250  | -0.538 | -0.135 | 0.047  | -0.720 |
| V75 | 1-O-Caffeoyl quinic acid                         | -0.738 | 0.523  | -0.383 | 0.015  | 0.235  |
| V76 | Aminomalonic acid                                | 0.691  | -0.713 | 0.459  | -0.015 | -0.140 |
| V77 | LysoPC 18:1                                      | -0.764 | 0.601  | -0.307 | 0.156  | 0.192  |
| V78 | LysoPC 18:3                                      | 0.313  | 0.182  | -0.773 | -0.291 | -0.572 |
| V79 | LysoPC 18:2                                      | 0.212  | 0.296  | -0.771 | -0.252 | -0.430 |
| V80 | 4-oxo-9Z,11Z,13E,15E-octadec<br>atetraenoic acid | 0.722  | -0.303 | 0.245  | 0.076  | 0.121  |
| V81 | Delta-Tridecalactone                             | 0.200  | -0.719 | -0.171 | -0.479 | -0.186 |

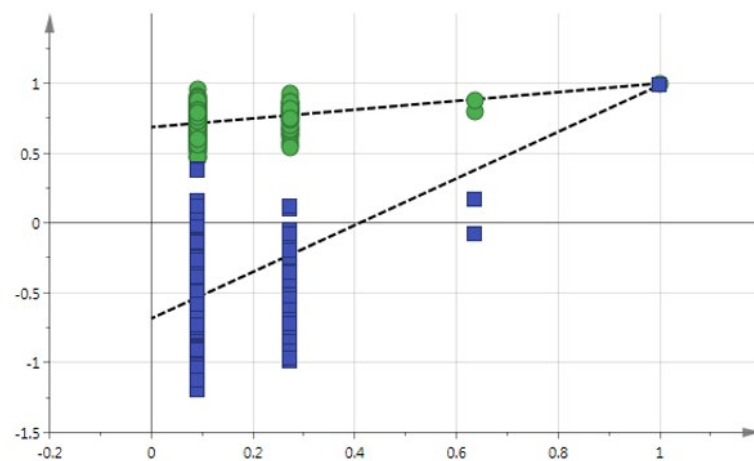

**Figure S1.** OPLS-DA permutations plot

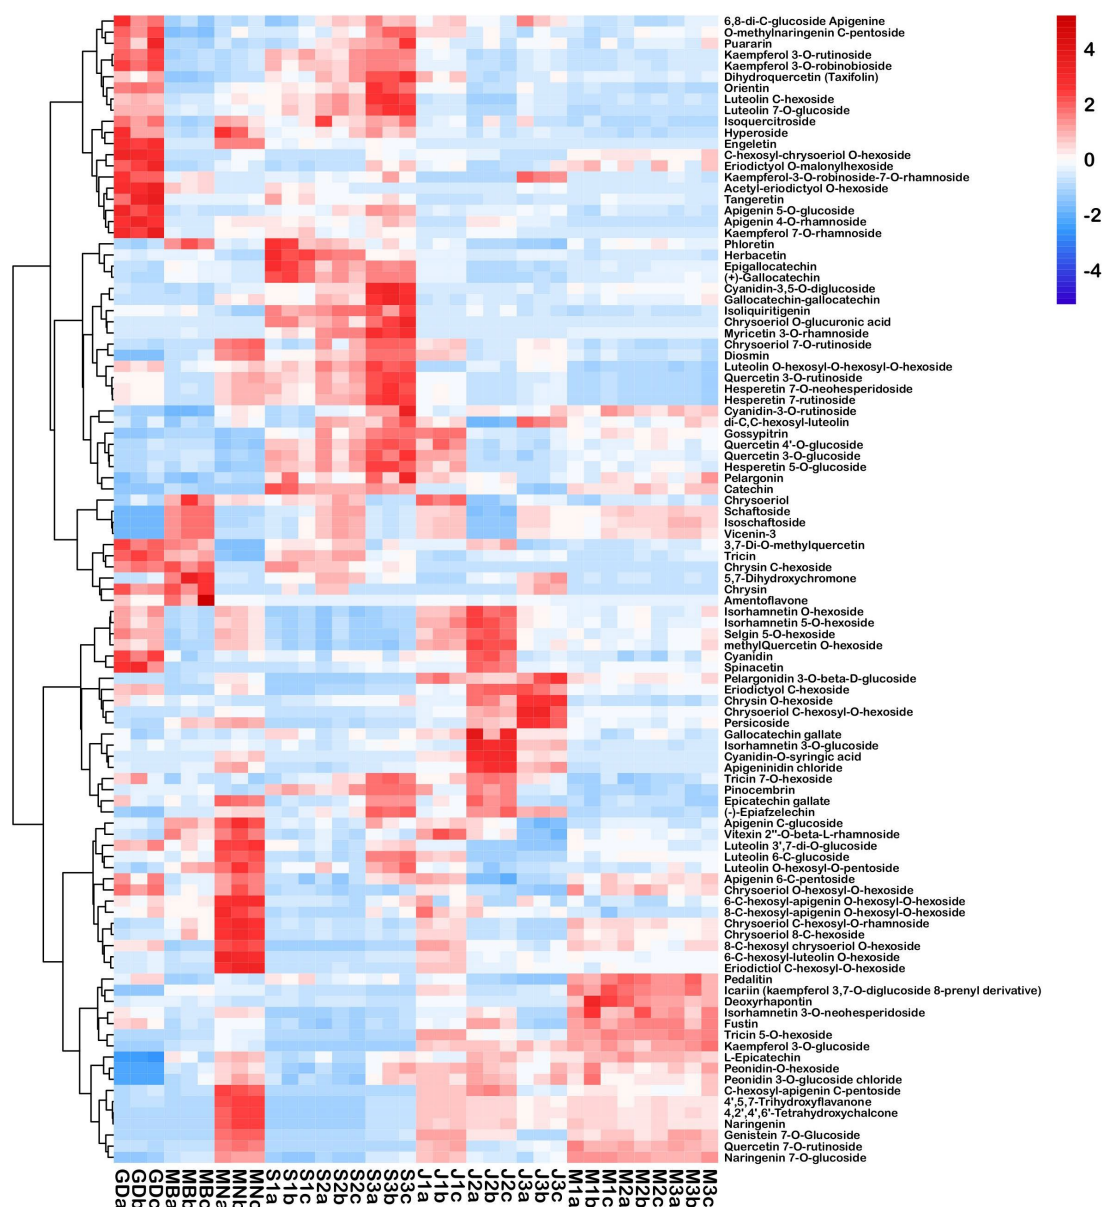

**Figure S2.** Heat map analysis of differential flavonoids. GD, Guangdong, China; MB, Northern Fujian, China; MN, Southern Fujian, China; MM, Myanmar; LK, Sri Lanka; JP, Japan. Red indicates high content and green indicates low content.  $P < 0.05$ .

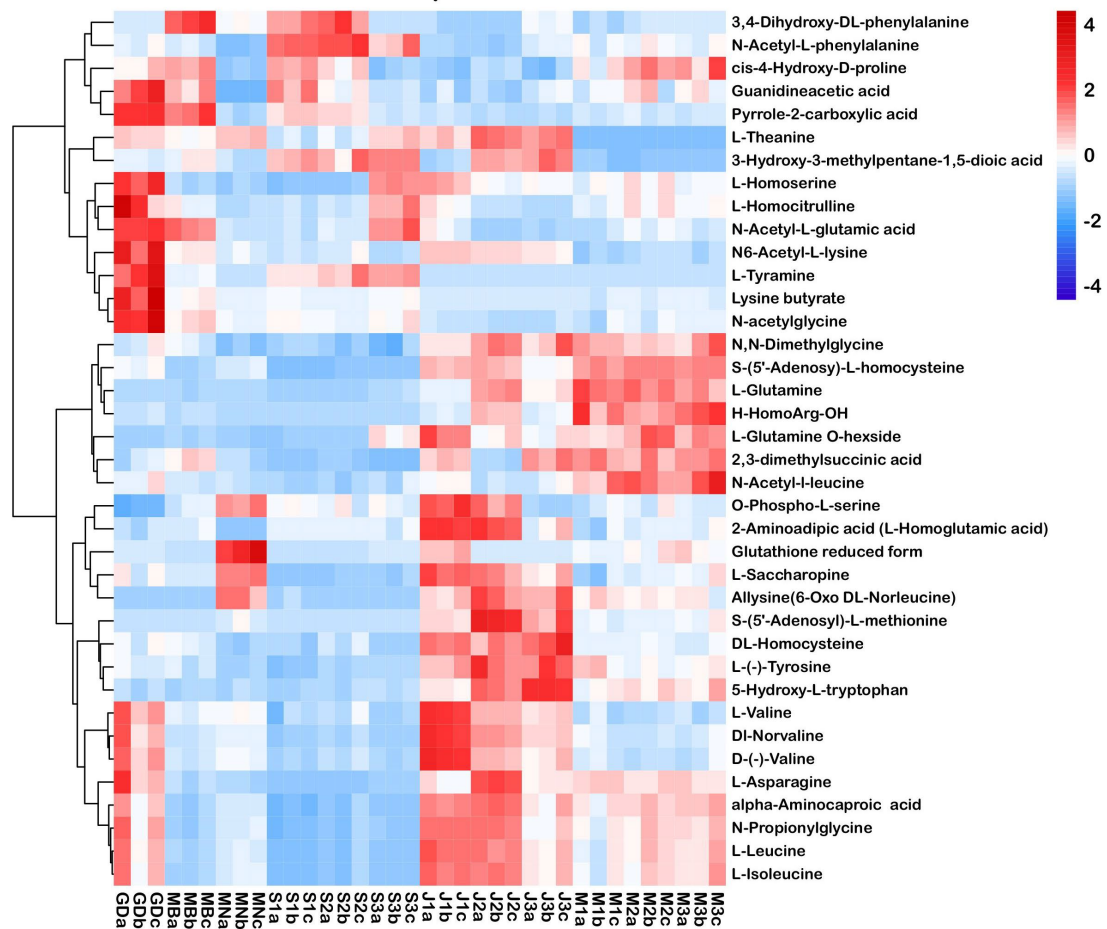

**Figure S3.** Heat map analysis of differential amino acid and their derivatives. GD, Guangdong, China; MB, Northern Fujian, China; MN, Southern Fujian, China; MM, Myanmar; LK, Sri Lanka; JP, Japan. Red indicates high content and green indicates low content.  $P < 0.05$ .



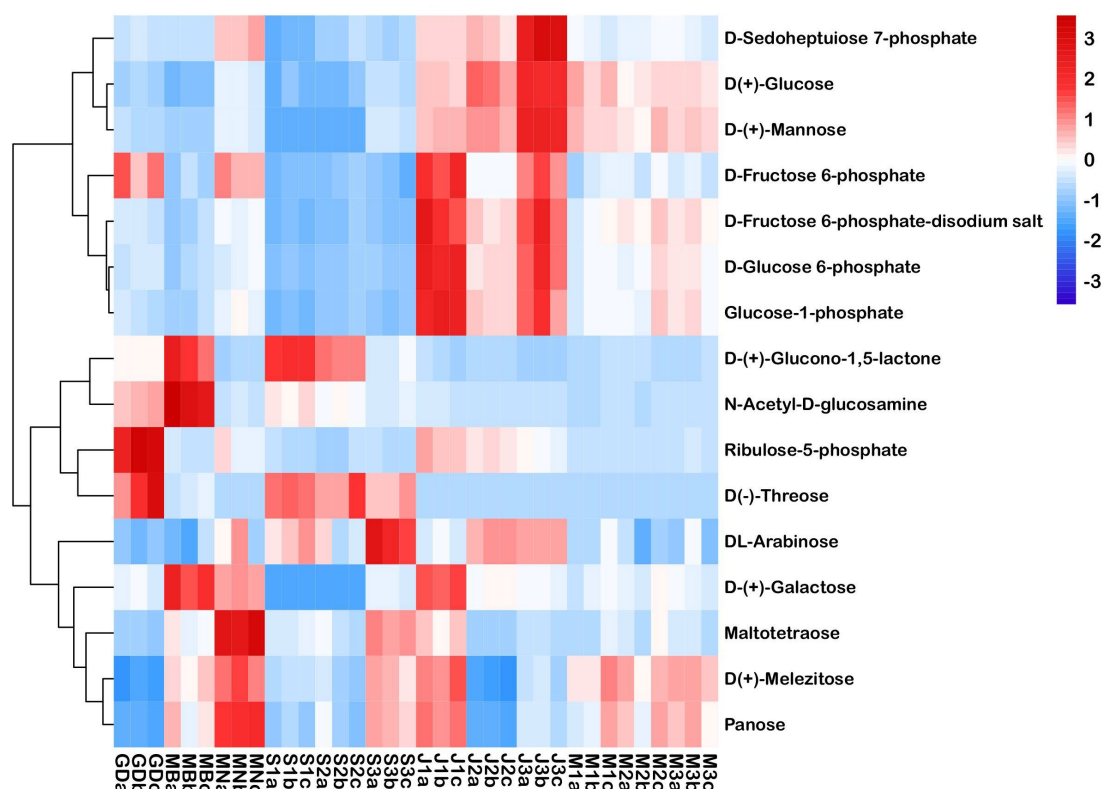

**Figure S4.** Heat map analysis of differential saccharides. GD, Guangdong, China; MB, Northern Fujian, China; MN, Southern Fujian, China; MM, Myanmar; LK, Sri Lanka; JP, Japan. Red indicates high content and green indicates low content.  $P < 0.05$ .

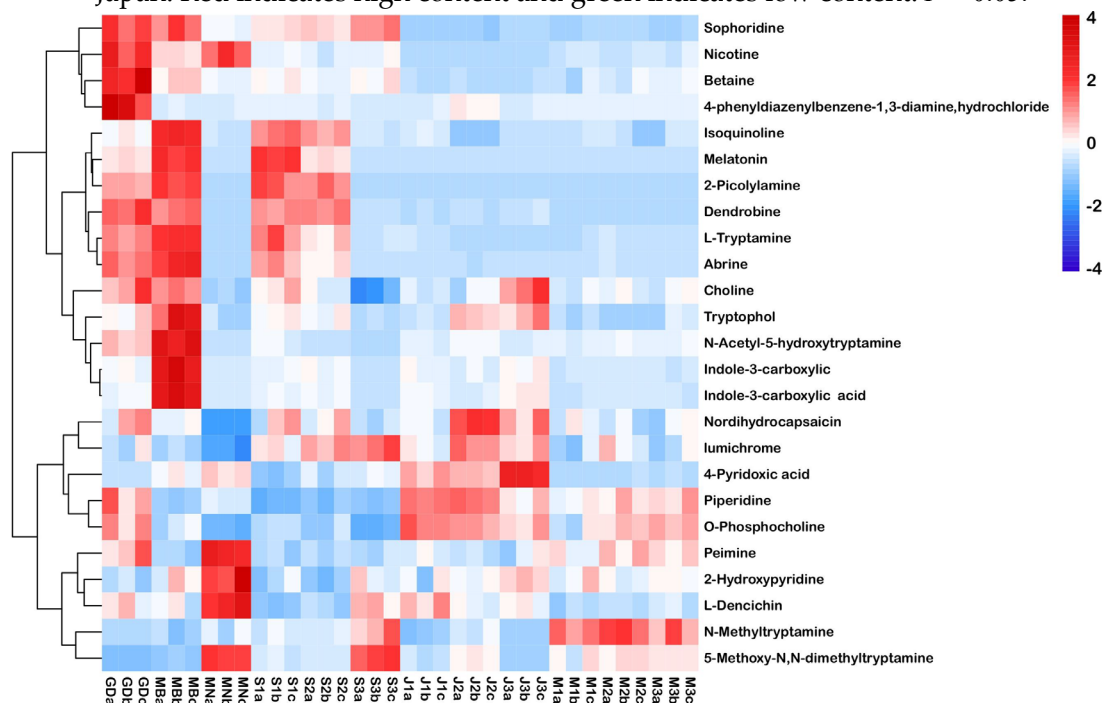

**Figure S5.** Heat map analysis of differential alkaloids. GD, Guangdong, China; MB, Northern Fujian, China; MN, Southern Fujian, China; MM, Myanmar; LK, Sri Lanka; JP, Japan. Red indicates high content and green indicates low content.  $P < 0.05$ .

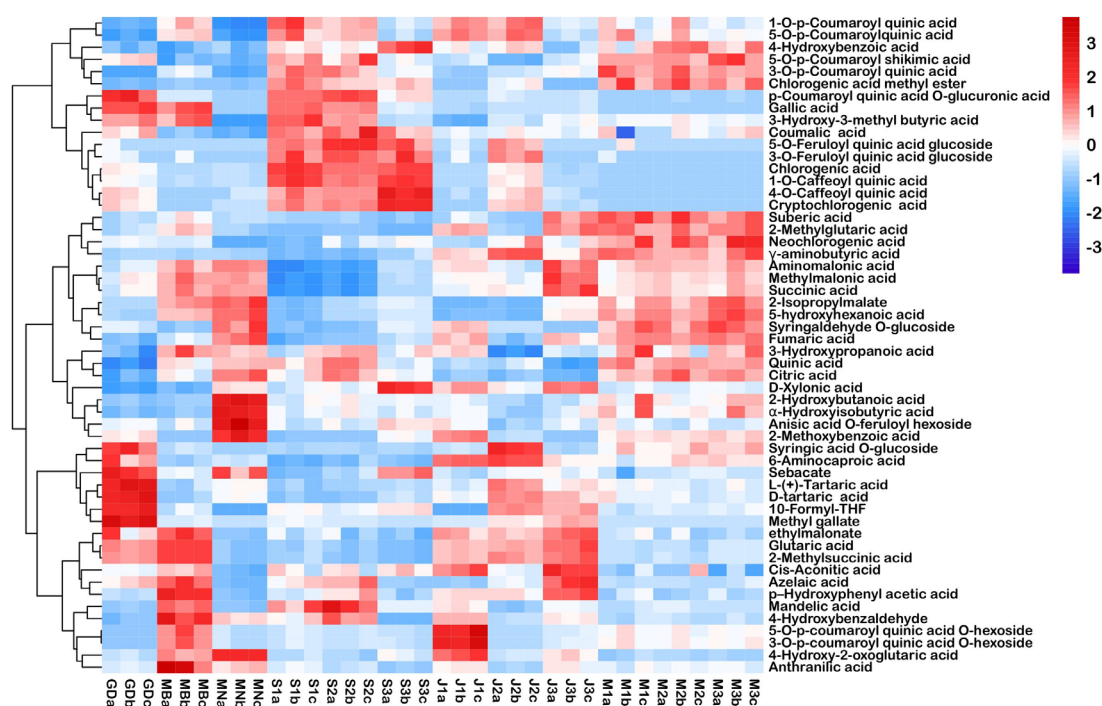

**Figure S6.** Heat map analysis of differential organic acids and their derivatives. GD, Guangdong, China; MB, Northern Fujian, China; MN, Southern Fujian, China; MM, Myanmar; LK, Sri Lanka; JP, Japan. Red indicates high content and green indicates low content.  $P < 0.05$ .

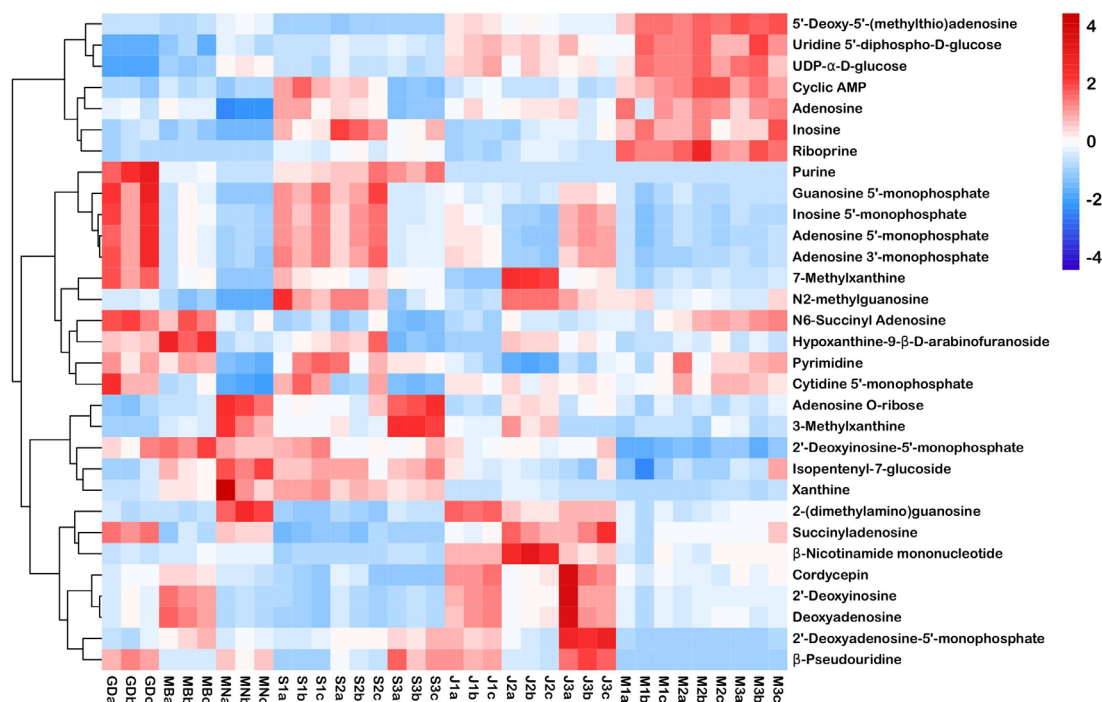

**Figure S7.** Heat map analysis of differential nucleotides and their derivatives. GD, Guangdong, China; MB, Northern Fujian, China; MN, Southern Fujian, China; MM, Myanmar; LK, Sri Lanka; JP, Japan. Red indicates high content and green indicates low content.  $P < 0.05$ .

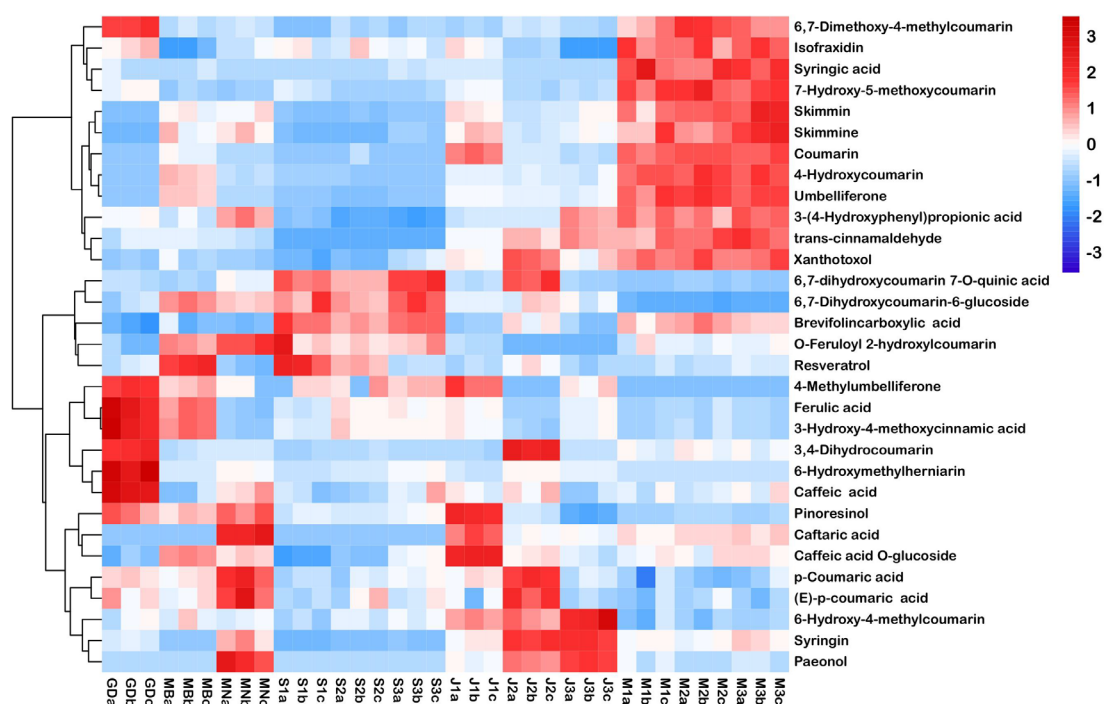

**Figure S8.** Heat map analysis of differential phenylpropanoids. GD, Guangdong, China; MB, Northern Fujian, China; MN, Southern Fujian, China; MM, Myanmar; LK, Sri Lanka; JP, Japan. Red indicates high content and green indicates low content.  $P < 0.05$ .

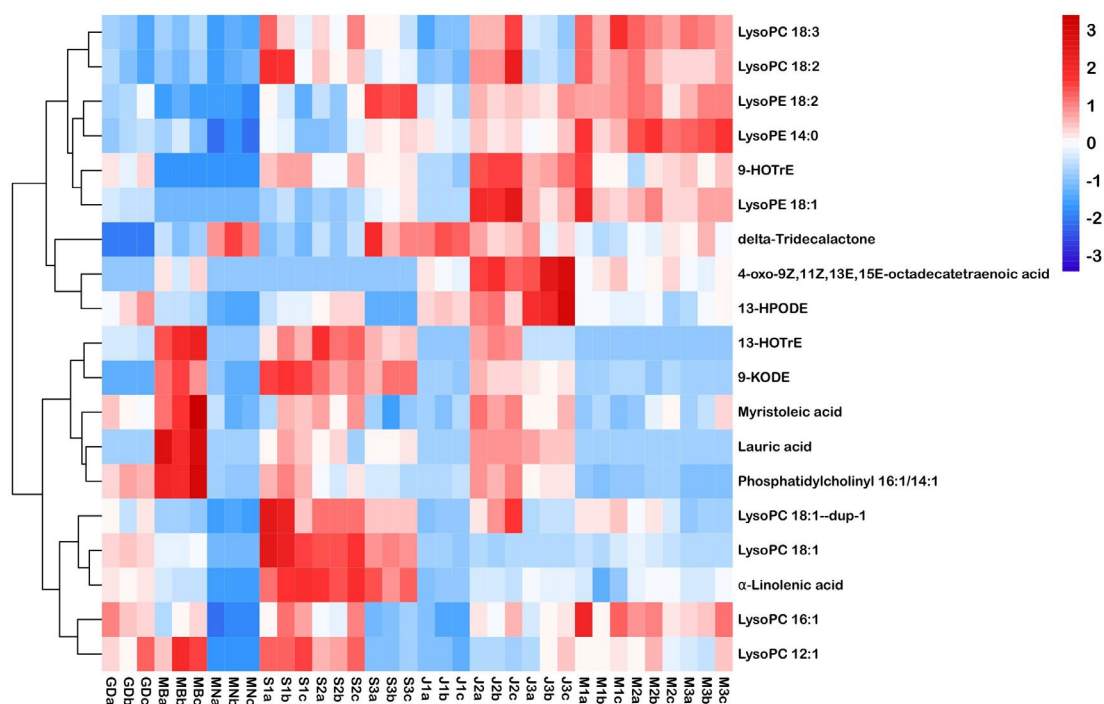

**Figure S9.** Heat map analysis of differential lipids. GD, Guangdong, China; MB, Northern Fujian, China; MN, Southern Fujian, China; MM, Myanmar; LK, Sri Lanka; JP, Japan. Red indicates high content and green indicates low content.  $P < 0.05$ .

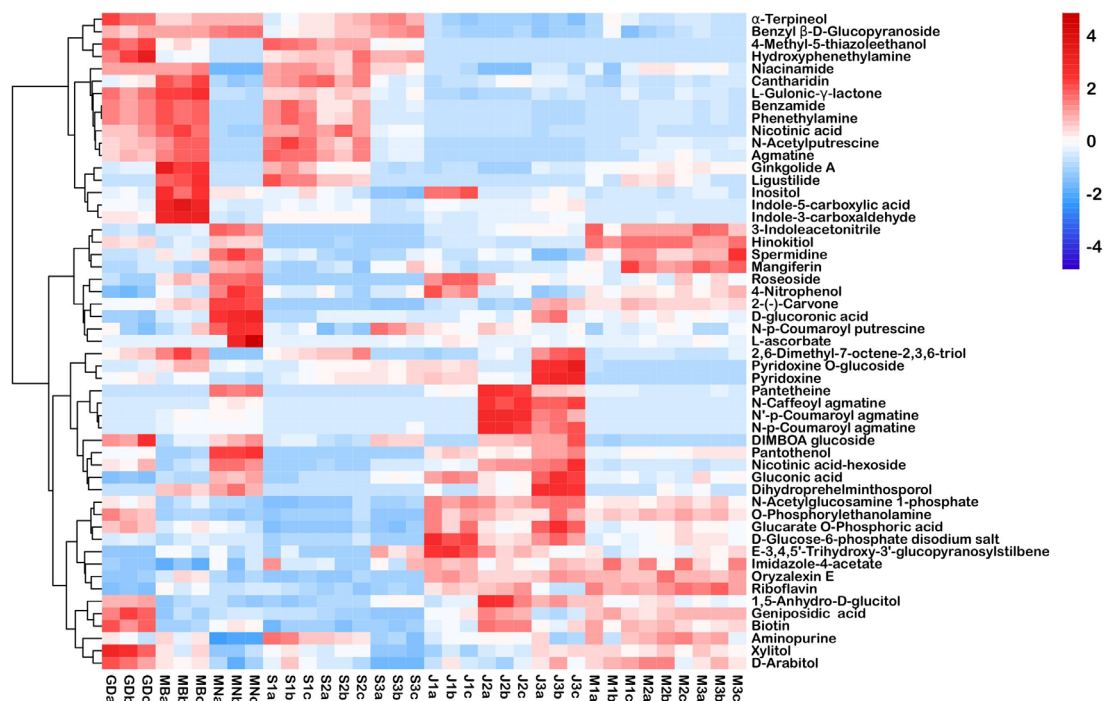

**Figure S10.** Heat map analysis of differential others. GD, Guangdong, China; MB, Northern Fujian, China; MN, Southern Fujian, China; MM, Myanmar; LK, Sri Lanka; JP, Japan. Red indicates high content and green indicates low content.  $P < 0.05$ .

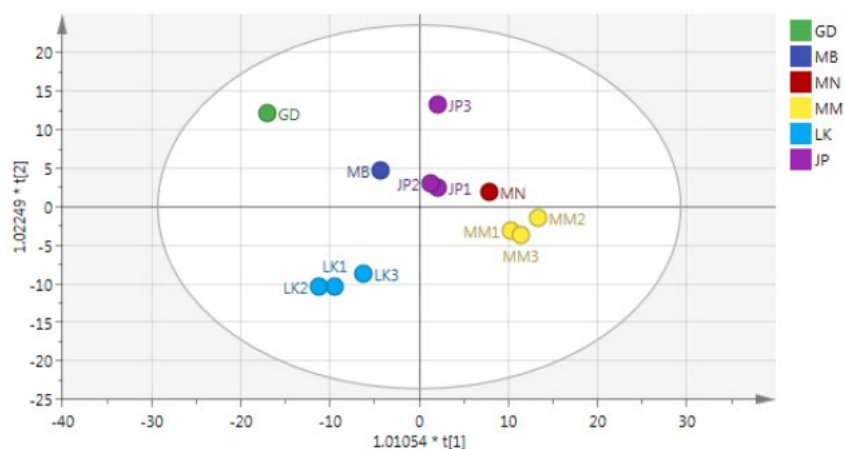

**Figure S11.** O2PLS score chart. GD, Guangdong, China; MB, Northern Fujian, China; MN, Southern Fujian, China; MM, Myanmar; LK, Sri Lanka; JP, Japan.  $P < 0.05$ .

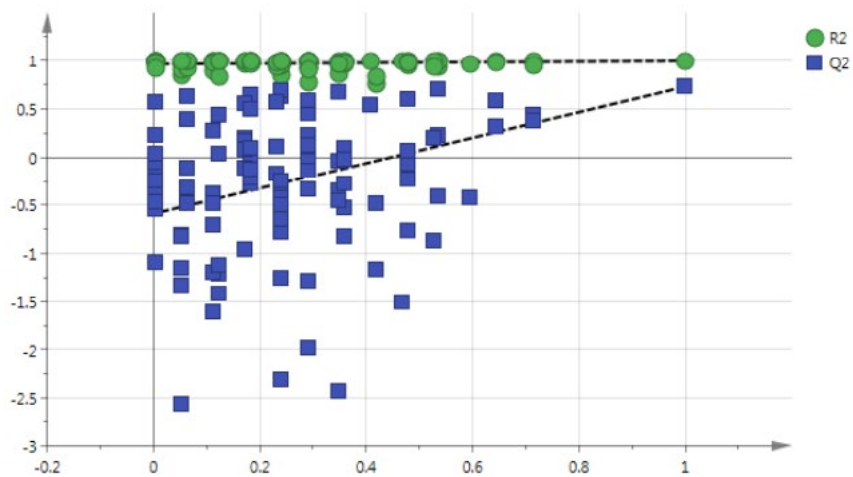

**Figure S12.** O2PLS permutations plot.  $R^2X = 0.964$ ,  $Q^2 = -0.589$ .
